# Supplementary material
Source: Springer Nature journal article supplement (https://www.springermedizin.de/resource/supplementary/12985_2013_2428_MOESM3_ESM.pdf/9607060)

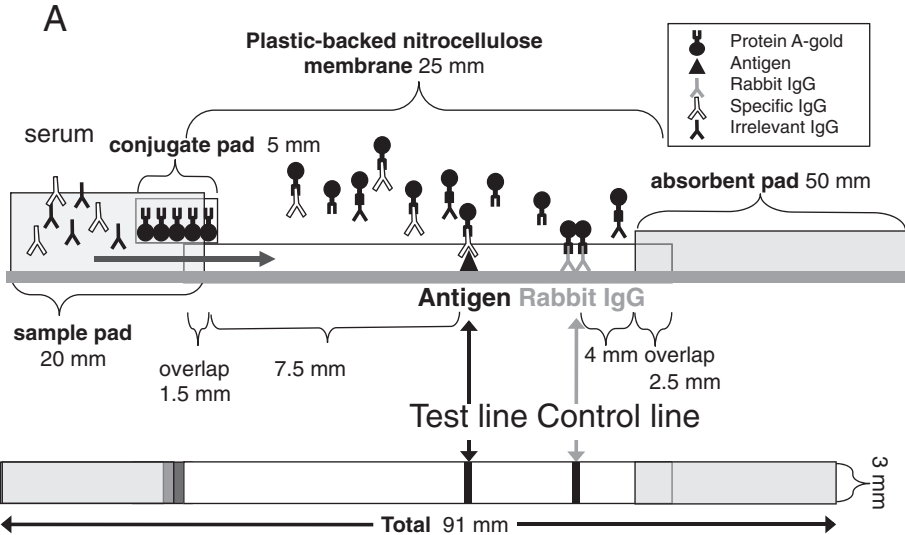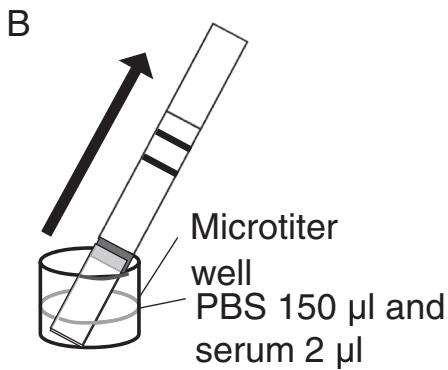

Supplement: MOESM3 [file 9607060]
